# Supplementary material for: Molecular Epidemiology of Drug-Resistant Tuberculosis in Shantou, China: Associations between Drug Resistance and Genotypic Variation
Source: Research Square preprint supplement (doi:10.21203/rs.3.rs-7713641/v1), 2025-10-17
Supplement: Supplementary file 1 [file 303b4dd9857cb3d9dc9f1574.docx]

**S2 Table 1. Repeat unit scoring rules for the 8-locus MIRU-VNTR typing system.**

| | **Locus** | | --- | | **Repeat unit size(bp)** | ****Flanking sequence size (bp)**** | **H37Rv: Amplicon size (bp) = (Repeat unit size × Number of repeat units) + Flanking sequence size + Partial repeat sequence** |
| --- | --- | --- | --- | --- |
| QUB-11b | 69 | 67 | 422=69×5+67+10 |
| QUB-18 | 78 | 182 | 621=78×5+78+49 |
| QUB-26 | 111 | 129 | 708=111×5+129+24 |
| MIRU26 | 48 | 243 | 387=48×3+243 |
| MIRU31 | 52 | 108 | 264=52×3+108 |
| MIRU40 | 54 | 354 | 408=54×1+354 |
| Mtub04 | 51 | 137 | 269=51×2+137+30 |
| Mtub21 | 57 | 92 | 206=57×2+92 |

**S2 Table 2. Correspondence between amplicon sizes and repeat unit numbers at 8 MIRU-VNTR loci.**

| **Number of repeat units** | **Amplicon size (bp)** | | | | | | | |
| --- | --- | --- | --- | --- | --- | --- | --- | --- |
| QUB-11b | QUB-18 | QUB-26 | MIRU26 | MIRU31 | MIRU40 | Mtub04 | Mtub21 |
| 0.5 | 70 | 224 | 153 | 246 | 162 | 230 | 167 | 149 |
| 1 | 139 | 302 | 264 | 297 | 215 | 284 | 218 | 206 |
| 2 | 208 | 380 | 375 | 348 | 268 | 338 | 269 | 263 |
| 3 | 277 | 458 | 486 | 399 | 321 | 392 | 320 | 320 |
| 4 | 346 | 536 | 597 | 450 | 374 | 446 | 371 | 377 |
| 5 | 415 | 614 | 708 | 501 | 427 | 500 | 422 | 434 |
| 6 | 484 | 692 | 819 | 552 | 480 | 554 | 473 | 491 |
| 7 | 553 | 770 | 930 | 603 | 533 | 608 | 524 | 548 |
| 8 | 622 | 848 | 1041 | 654 | 586 | 662 | 575 | 605 |
| 9 | 691 | 926 | 1152 | 705 | 639 | 716 | 626 | 662 |
| 10 | 760 | 1004 | 1263 | 756 | 692 | 770 | 677 | 719 |
| 11 | 760 | 1082 | 1374 | 807 | 745 | 824 | 728 | 776 |
| 12 | 829 | 1160 | 1485 | 858 | 798 | 878 | 779 | 833 |
| 13 | 898 | 1238 | 1596 | 909 | 851 | 932 | 830 | 890 |
| 14 | 967 | 1316 | 1707 | 960 | 904 | 986 | 881 | 947 |
| 15 | 1036 | 1394 | 1818 | 1011 | 957 | 1040 | 932 | 1004 |
