# Supplementary material for: Molecular Epidemiology of Drug-Resistant Tuberculosis in Shantou, China: Associations between Drug Resistance and Genotypic Variation
Source: Research Square preprint supplement (doi:10.21203/rs.3.rs-7713641/v1), 2025-10-17
Supplement: Supplementary file 2 [file 307e5c7f0169276327e4b888.docx]

**S3 Table1. Reference sequence of IS6110 in Mycobacterium tuberculosis**

| Name | Lineage | References | GenBank accession |
| --- | --- | --- | --- |
| H37Rv | L4.9 | THIERRY et al.,1990 | No.GCF_000195955.2 |
| M.bovis | L Animal | HERMANS et al.,1991 | No.GCF_000195835.3 |
| H210 | L2.2/Beijing | BEGGS et al.,2000 | No.CP019613.1 |
| H2255 | L2.2/Beijing | BEGGS et al.,2000 | No.AF230209.1 |
| SAWC0305 | L2/F11 | WARREN et al.,2002 | No.AH011632.2 |
| SAWC0278 | L2/F11 | WARREN et al.,2002 | No.AH011631.2 |
| SAWC0540 | L2/F15 | SAMPSON et al.,1999 | No.AF126477.1 |
| SAWC0480 | L2/F28 | WARREN et al.,2002 | No.AY053439.1 |
| SAWC0235 | L2/F28 | WARREN et al.,2002 | No. AY053427.1 |
| HMS18037 | L4.1.2.1 | COMIN et al.,2022 | No.MZ574187.1 |
| HSJ234 | L4.1.2.1 | COMIN et al.,2022 | No.MZ574185.1 |
| HMS18031 | L4.1.2.1 | COMIN et al.,2022 | No.MZ574182.1 |
| HMS18014 | L4 | COMIN et al.,2022 | No.MZ574183.1 |
| HMS18025 | L4.3 | COMIN et al.,2022 | No.MZ574181.1 |
| HMS1693 | L6 | COMIN et al.,2021 | No.MZ574188.1 |
| HMS2382 | L6 | COMIN et al.,2021 | No.MZ574186.1 |
