# Supplementary material for: Molecular Epidemiology of Drug-Resistant Tuberculosis in Shantou, China: Associations between Drug Resistance and Genotypic Variation
Source: Research Square preprint supplement (doi:10.21203/rs.3.rs-7713641/v1), 2025-10-17
Supplement: Supplementary file 3 [file ec45494e687397db8844ab4e.docx]

**S1 Table1. **PCR reaction mixtures for drug resistance genes, IS6110, and** MIRU-VNTR **amplification****

| **Reaction** | **System details** | **Volumetric(μL)** |
| --- | --- | --- |
| Drug resistance genes | 20 μL 2× Taq Master Mix; 0.5 μL each primer (10 pmol/L); 1 μL DNA template; 18 μL ddH₂O. | 40 |
| IS6110 | 20 μL 2× Taq Master Mix; 0.5 μL each primer (10 pmol/L); 4 μL DNA template; 15 μL ddH₂O. | 40 |
| MIRU-VNTR | 20 μL 2× Taq Master Mix; 0.4 μL each primer (10 pmol/L); 4 μL DNA template; 15.2 μL ddH₂O. | 40 |

**S1 Table2. **PCR reaction conditions for drug resistance genes, IS6110, and MIRU-VNTR amplification****

| Genes | Cycling conditions |
| --- | --- |
| *rpoB*,*rpsL*, *gyrA* | Pre-denaturation 95°C for 4 min; 38 cycles (denaturation at 95°C for 30 s, annealing at 66°C for 30 s, extension at 72°C for 1.5 min), extension at 72°C for 7 min. |
| *katG*,*inhA*,*embB*,*rrs*,*pncA*,*gyrB* | Pre-denaturation 95°C for 4 min; 38 cycles (denaturation at 95°C for 30 s, annealing at 63°C for 30 s, extension at 72°C for 1.5 min), extension at 72°C for 7 min. |
| IS6110 | Pre-denaturation 94°C for 10 min; 40 cycles (denaturation at 94°C for 30 s, annealing at 60°C for 30 s, extension at 72°C for 60 s ), extension at 72°C for 7 min. |
| QUB-11b,QUB-18,QUB-26,MIRU26,  MIRU31,MIRU40,Mtub04,Mtub21 | Pre-denaturation 96°C for 5 min; 40 cycles (denaturation at 96°C for 15 s, annealing at 60°C for 30s, extension at 72°C for 2 min ), extension at 72°C for 7 min. |
